# Supplementary material for: Integrated effects of organic amendments and microbial inoculants on soil quality and wheat growth performance
Source: Research Square preprint supplement (doi:10.21203/rs.3.rs-7018728/v1), 2025-07-15
Supplement: Supplementary file 1 [file 3ae4939b13bd5b526685d088.docx]

**Supporting materials**

**Fig. S1** Correlation analysis of wheat indexes under combined application of organic materials and microbial inoculants. *, ** and *** present significance at *P*<0.05, *P*<0.01 and *P*<0.001, respectively. Abbreviations: PH—plant height; SD—stem diameter; LS—leaf surface area; SPAD—chlorophyll; SFW—shoot fresh weight; SDW—shoot dry weigh; RFW—root fresh weigh; RDW—root dry weight; pH—soil pH; OM—organic matter; TN—total nitrogen; AP—available phosphors; AK—available potassium; SN—shoot nitrogen content; SP—shoot phosphorus content; SK—shoot potassium content; RN—root nitrogen content; RP—root phosphorus content; RK—root potassium content; BAC—bacteria; FUN—fungi; ACT—actinomyces.


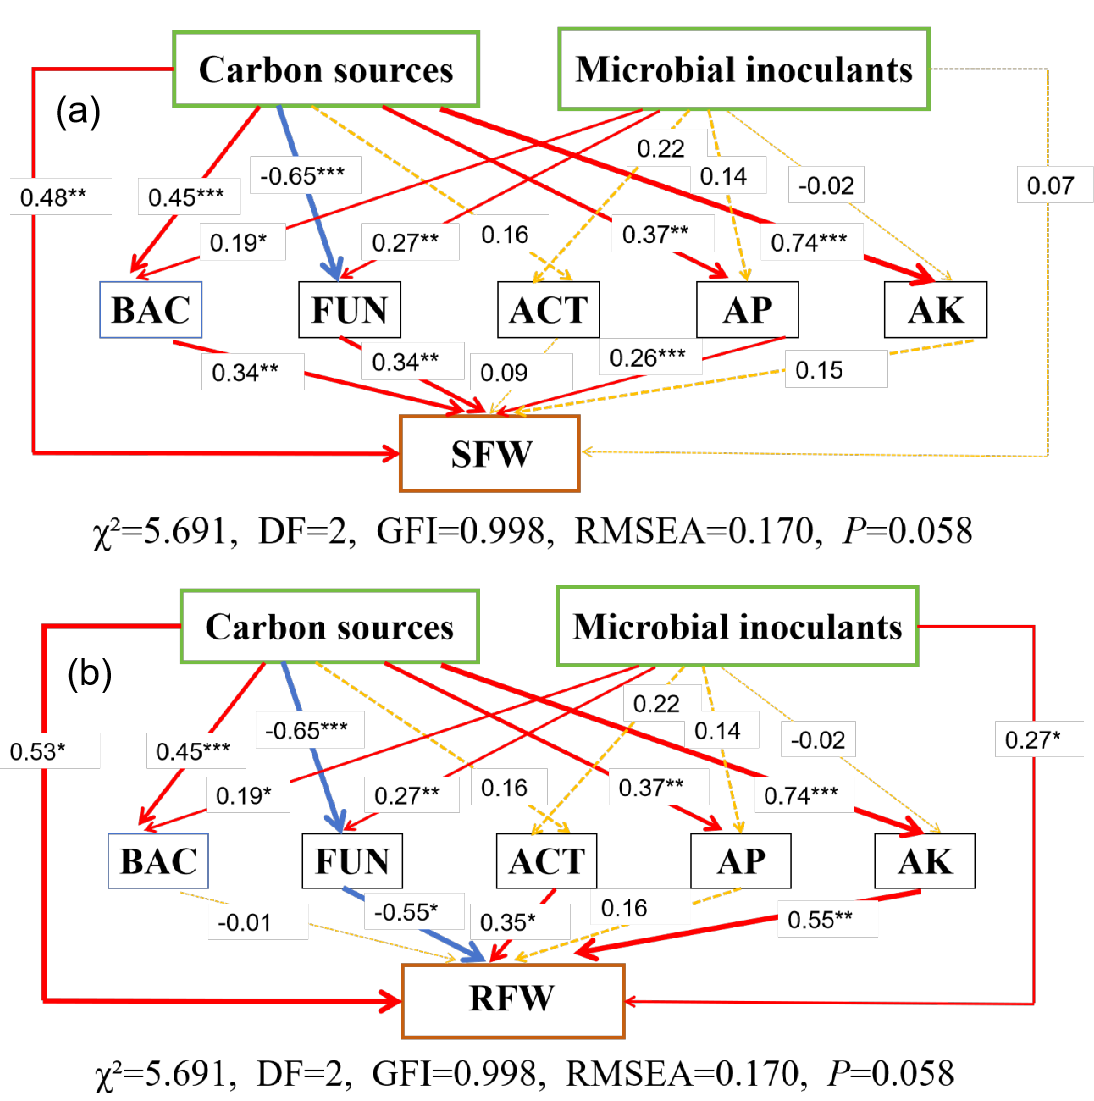


**Fig. S2** Structural equation modeling (SEM) of shoot and root fresh weight of wheat. (a) shoot fresh weight; (b) root fresh weight. Abbreviations: SFW—shoot fresh weight; RFW—root fresh weigh; BAC—bacteria; FUN—fungi; ACT—actinomyces; AP—Available phosphors; AK—Available potassium.χ2: chi-square value, DF: degree of freedom, GFI: fitness index, RMSEA: root mean square of the error of approximation; * denotes *P*<0.05, ** denotes *P*<0.01, and *** denotes *P*<0.001; red arrows denote a significant positive effect, blue arrows denote a significant negative effect, the thickness of the arrow line denotes the magnitude of the path coefficients in the model, and the yellow dashed line denotes no significant effect.
